# Supplementary material for: The draft genome and transcriptome of Cannabis sativa
Source: Springer Nature journal article supplement (doi:10.1186/gb-2011-12-10-r102), 2011-10-20
Supplement: 13059_2011_2681_MOESM1_ESM.pdf [file 13059_2011_2681_MOESM1_ESM.pdf]

(a) *Cannabis sativa*

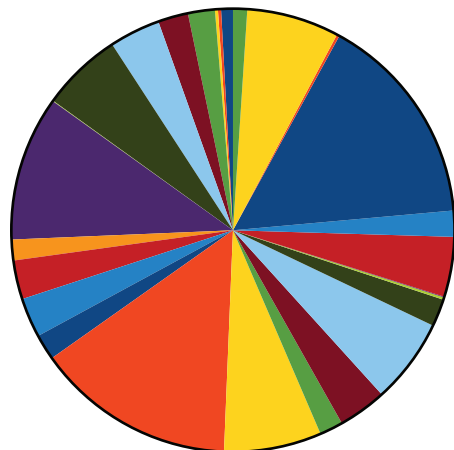

(b) *Arabidopsis thaliana*

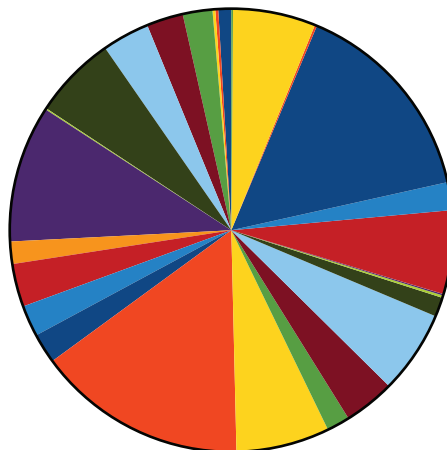

■ Calcium-binding protein  
■ Cell adhesion molecule  
■ Cell junction protein  
■ Chaperone  
■ Cytoskeletal protein  
■ Defense/immunity protein  
■ Enzyme modulator

■ Oxidoreductase  
■ Phosphatase  
■ Protease  
■ Receptor  
■ Signaling molecule  
■ Storage protein  
■ Structural protein

■ Extracellular matrix protein  
■ Hydrolase  
■ Isomerase  
■ Ligase  
■ Lyase  
■ Membrane traffic protein  
■ Nucleic acid binding

■ Surfactant  
■ Transcription factor  
■ Transfer/carrier protein  
■ Transferase  
■ Transmembrane protein  
■ Transporter  
■ Viral protein
