# Supplementary figures and images for: The draft genome and transcriptome of Cannabis sativa
Source: Springer Nature journal article supplement (doi:10.1186/gb-2011-12-10-r102), 2011-10-20

**(a)**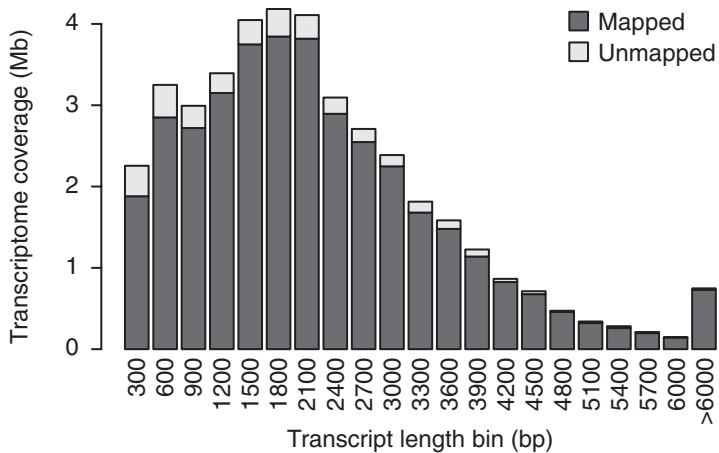**(b)**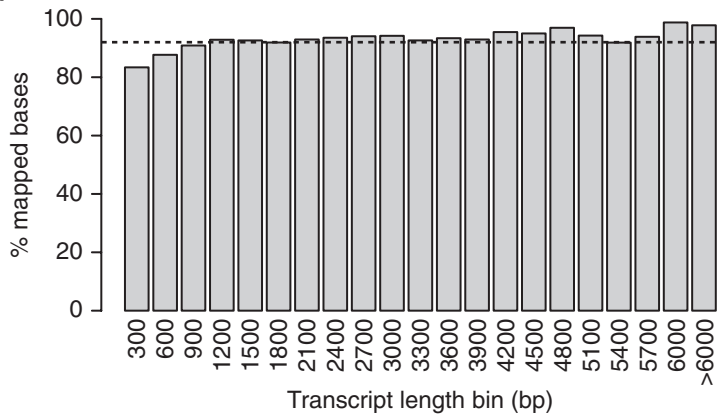

Supplement: 13059_2011_2681_MOESM2_ESM.pdf [file 13059_2011_2681_MOESM2_ESM.pdf]

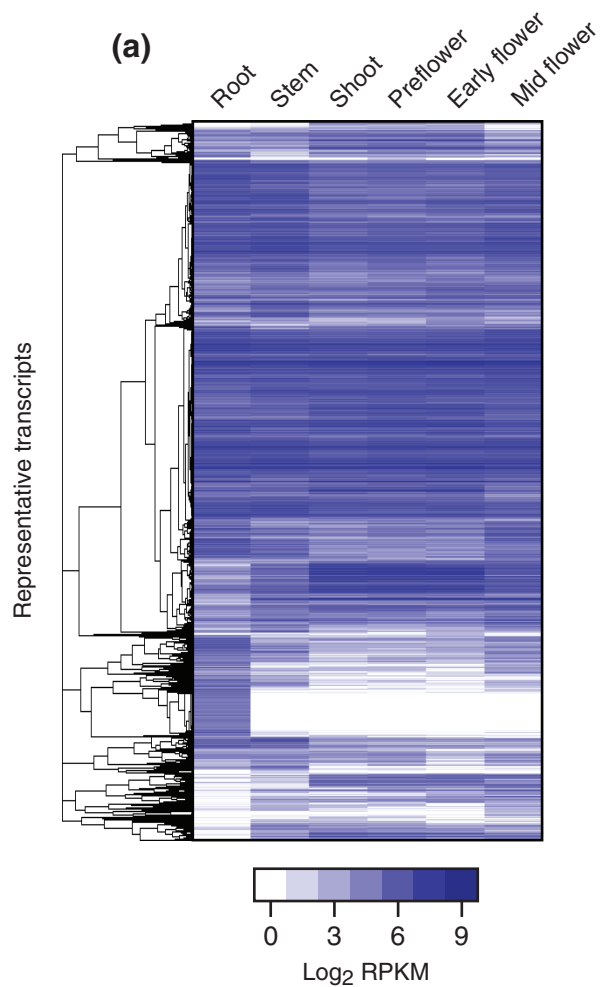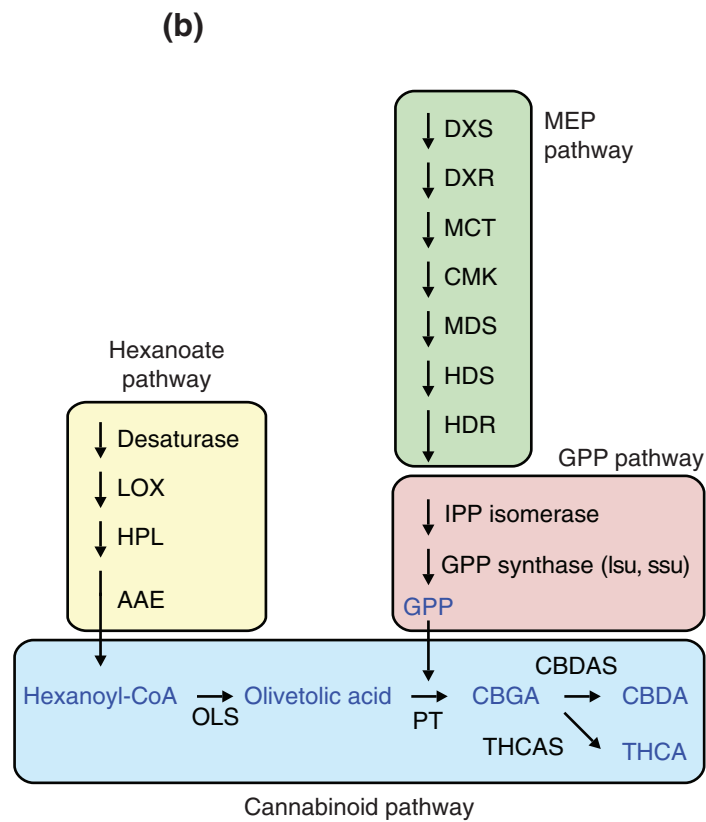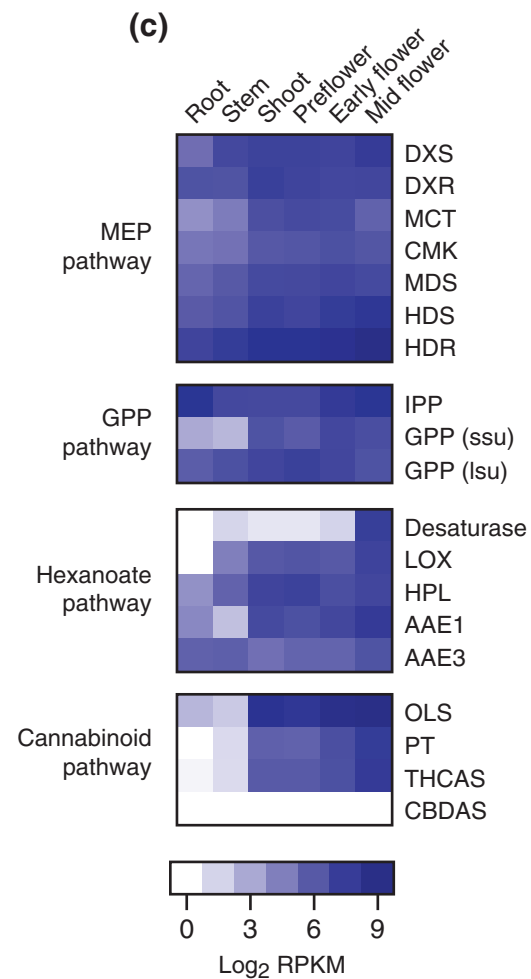

Supplement: 13059_2011_2681_MOESM3_ESM.pdf [file 13059_2011_2681_MOESM3_ESM.pdf]

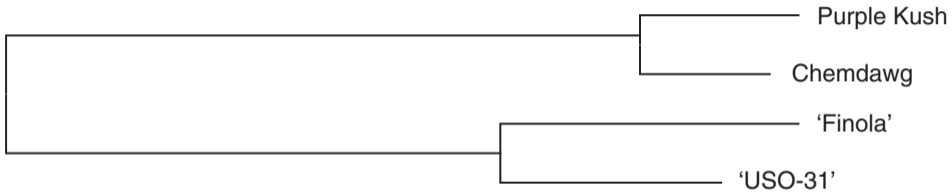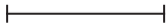

0.2

Supplement: 13059_2011_2681_MOESM5_ESM.pdf [file 13059_2011_2681_MOESM5_ESM.pdf]
